# Supplementary material for: Stimulation of Surface Polysaccharide Production under Aerobic Conditions Confers Aerotolerance in Campylobacter jejuni
Source: PubMed Central journal article supplement (PMC10100837; doi:10.1128/spectrum.03761-22), 2023-02-14
Supplement: spectrum.03761-22-s0002.pdf [file spectrum.03761-22-s0002.pdf]

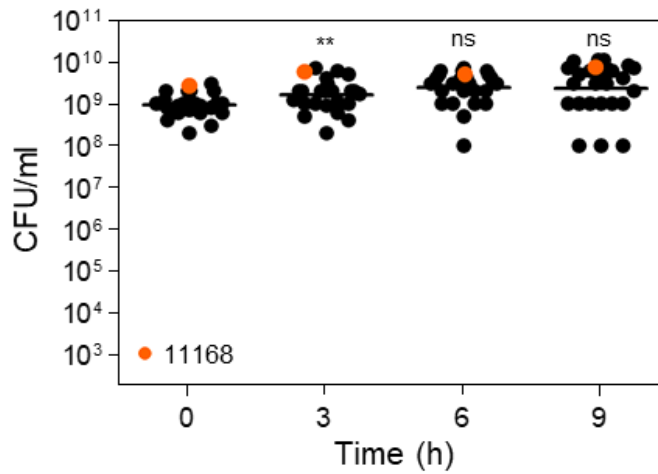

1

2 **Fig. S1.** The CFU values of 26 strains of *C. jejuni* under aerobic conditions. *C. jejuni* strains were  
 3 incubated with shaking at 200 rpm under aerobic conditions for 9 h. Solid horizontal lines indicate  
 4 average CFUs. Statistical significance was determined with Student's *t*-test compared to the CFU  
 5 values of the previous time point. \*\**P* < 0.01, ns; not significant.

6

7

8

9

10

11

12

13

14

15

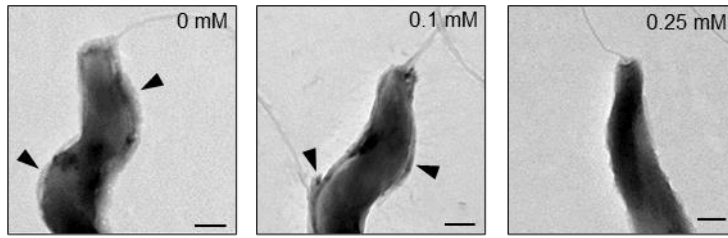

16

17 **Fig. S2. Transmission electron microscopic (TEM) images of *C. jejuni* after exposure to**

18 **aerobic conditions in the presence or absence of EDTA. *C. jejuni* NCTC 11168 was incubated**

19 **with shaking at 200 rpm under aerobic conditions for 4 h with or without EDTA. Black triangles**

20 **indicate surface polysaccharides stained with Alcian blue. Scale bars represent 200 nm.**

21

22

23

24

25

26

27

28

29

30

31

32

33

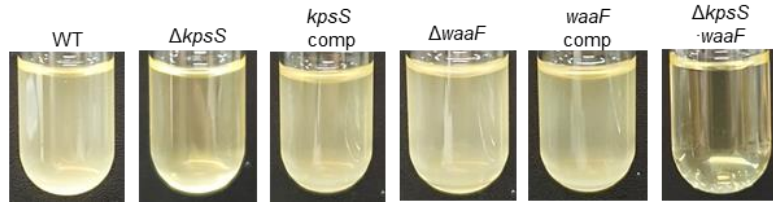

34

35 **Fig. S3. Bacterial culture images of *C. jejuni* wild type (WT) and mutants defective in surface**

36 **polysaccharide synthesis under aerobic conditions after 9 h. A  $\Delta kpsS$  mutant ( $\Delta kpsS$ ), a *kpsS*-**

37 **complemented strain (*kpsS* comp), a  $\Delta waaF$  mutant ( $\Delta waaF$ ), a *waaF*-complemented strain (*waaF***

38 **comp), and a  $\Delta kpsS/\Delta waaF$  double mutant ( $\Delta kpsS\cdot waaF$ ).**

39

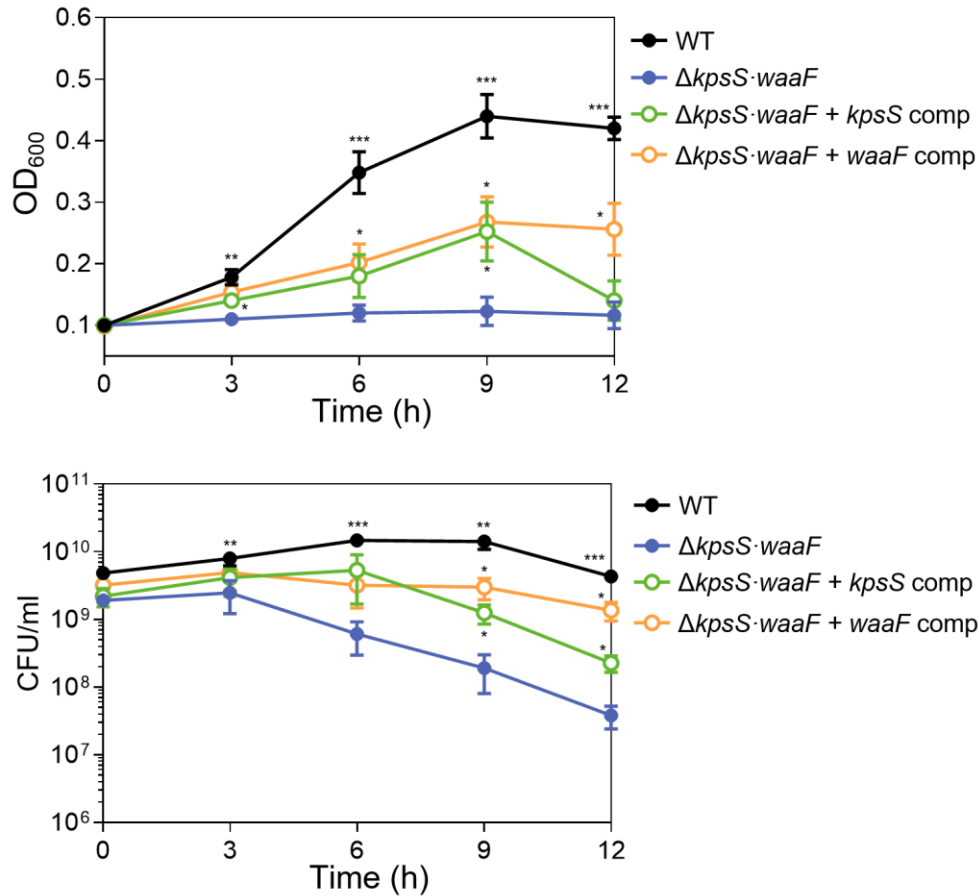

40

41 **Fig. S4. Aerotolerance recovery in the  $\Delta kpsS/\Delta waaF$  double mutant by partial**  
 42 **complementation with either  $kpsS$  or  $waaF$ .** The OD<sub>600</sub> and CFU of the *C. jejuni* strains after  
 43 aerobic cultivation with shaking at 200 rpm. The data present the means and the standard errors of  
 44 the mean (SEM) of the results of five experiments. Statistical significance was determined with  
 45 Student's *t*-test compared to the values of the double mutant ( $\Delta kpsS \cdot waaF$ ) at the same time point  
 46 ( $*P < 0.05$ ,  $**P < 0.01$ ,  $***P < 0.001$ ). A wild type (WT), a  $\Delta kpsS/\Delta waaF$  double mutant  
 47 ( $\Delta kpsS \cdot waaF$ ), a  $kpsS$ -complemented  $\Delta kpsS/\Delta waaF$  double mutant ( $\Delta kpsS \cdot waaF + kpsS$  comp),  
 48 and a  $waaF$ -complemented  $\Delta kpsS/\Delta waaF$  double mutant ( $\Delta kpsS \cdot waaF + waaF$  comp).

49

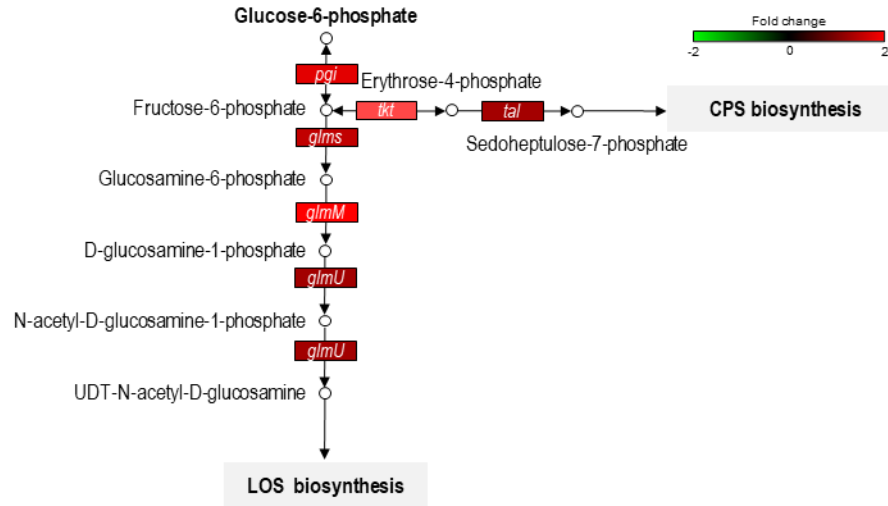

50

51 **Fig. S5. Changes in the transcriptional levels of the genes involved in CPS and LOS synthesis**  
 52 **under aerobic conditions.** Transcriptional levels of genes involved in CPS and LOS biosynthesis  
 53 in *C. jejuni* under aerobic conditions were assessed by RNA-Seq. Fold change was defined as  
 54  $RPKM_{\text{aerobic conditions}}/RPKM_{\text{microaerobic conditions}}$ . The diagram was prepared based on KEGG database  
 55 ([https://www.genome.jp/kegg-bin/show\\_pathway?cje01250](https://www.genome.jp/kegg-bin/show_pathway?cje01250)).

56

57

58

59

60

61

62

63

64

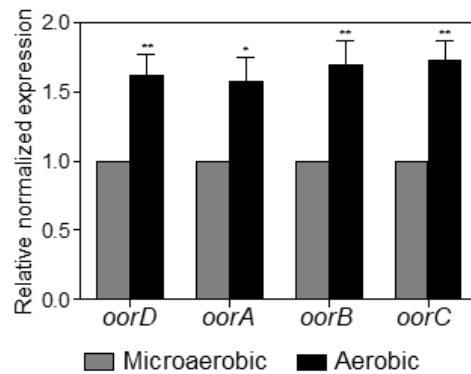

65

66 **Fig. S6. Confirmation of the up-regulation of the *oor* genes under aerobic conditions using**

67 **qRT-PCR.** The transcriptional levels of *oorD*, *oorA*, *oorB* and *oorC* in the wild type were analyzed

68 with qRT-PCR to confirm the results of RNA-Seq. The expression values were normalized using

69 samples prepared under microaerobic conditions. The data present the means and the standard

70 errors of the mean (SEM) of the results of three experiments. Statistical significance was

71 determined with Student *t*-test compared to the results of microaerobic samples (\**P* < 0.05, \*\**P* <

72 0.01).

73

74

75

76

77

78

79

80

81

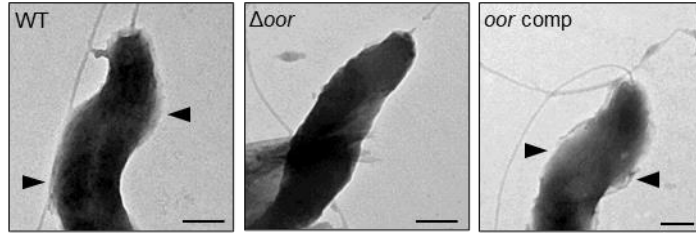

82

83 **Fig. S7. Transmission electron microscopic (TEM) images of wild type (WT; *C. jejuni* NCTC**  
84 **11168), an  $\Delta oor$  mutant, and an *oor*-complemented strain after aerobiosis for 4 h. Black**  
85 **triangles indicate CPS and LOS. Scale bars represent 200 nm.**

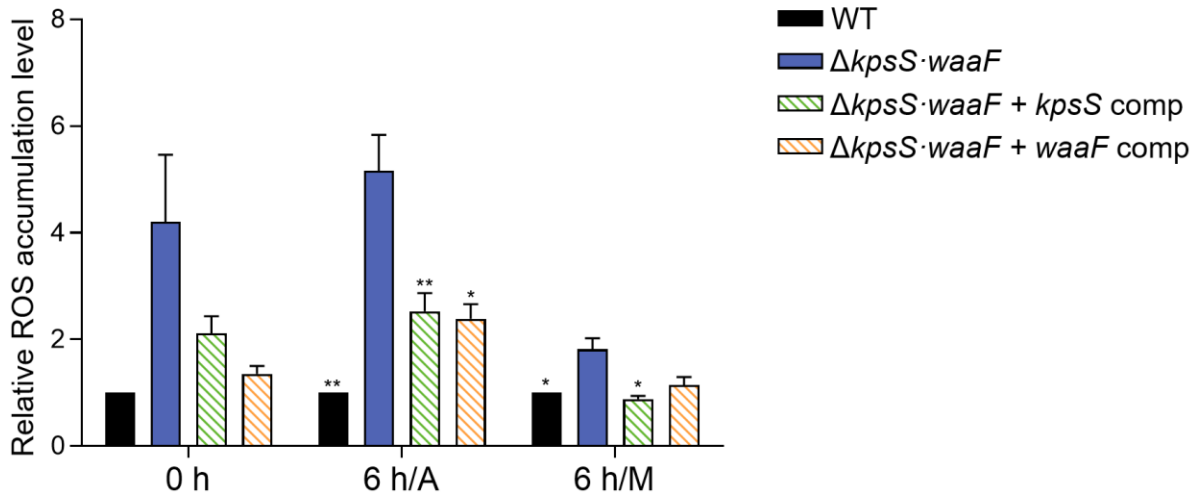

86

87 **Fig. S8. ROS accumulation in the  $\Delta kpsS/\Delta waaF$  double mutant complemented with either**

88 ***kpsS* or *waaF*.** The relative levels of the total ROS accumulation in the *C. jejuni* strains before/after

89 exposure to aerobic and microaerobic conditions for 6 h. A and M stand for aerobic and

90 microaerobic conditions, respectively. The level of total ROS accumulation in WT was set as 1. A

91 wild type (WT), a  $\Delta kpsS/\Delta waaF$  double mutant ( $\Delta kpsS \cdot waaF$ ), a *kpsS*-complemented

92  $\Delta kpsS/\Delta waaF$  double mutant ( $\Delta kpsS \cdot waaF + kpsS$  comp), and a *waaF*-complemented

93  $\Delta kpsS/\Delta waaF$  double mutant ( $\Delta kpsS \cdot waaF + waaF$  comp). The data present the means and the

94 standard errors of the mean (SEM) of the results of five experiments. Significance was assessed

95 using one-way ANOVA (\* $P < 0.05$ , \*\* $P < 0.01$ ).



96 **Table S2. Primers used in this study**

| <b>Primer</b>  | <b>Sequence (5'-3')</b>            | <b>Reference</b> |     |
|----------------|------------------------------------|------------------|-----|
| <b>Cloning</b> |                                    |                  |     |
| oor-Sall-F     | AAAGTCGACCGCAGCAGAAGCAAAGACAA      | This study       |     |
| oor-BamHI-R    | AAAGGATCCTCACTCTCATCTGCGATAGC      |                  |     |
| oor-inverse-F  | GGGTGTAAAATACGCCACTCAA             |                  |     |
| oor-inverse-R  | CTCATCTACCCAAACAGGGG               |                  |     |
| Kan-F          | GCGATGAAGTGC GTAAG                 |                  |     |
| Kan-R          | CGGCTCCGTCGATACTATG                |                  |     |
| oor-compl-F    | AAATCTAGACACCGAGCATAACGCCTGTAA     |                  |     |
| oor-compl-R    | ATTCTAGATTGGTTCAGATGCTAAAACATTACT  |                  |     |
| kpsS-compl-F   | TAGTCTAGACTTCCCTATCCATAACAATAATTCT |                  |     |
| kpsS-compl-R   | TAGTCTAGACCGCTTTTCAAATAACAATGGCT   |                  |     |
| waaF-compl-F   | AAATCTAGAGCCCAAACCGACCAGCAAAAATGCC |                  |     |
| waaF-compl-R   | AAATCTAGACTGATGGAGAAAAAGCTTGTTTTG  |                  |     |
| <b>qRT-PCR</b> |                                    |                  |     |
| 16s-RT-F       | ATAAGCACCGGCTAACTCCG               |                  | (1) |
| 16s-RT-R       | TTCCATCTGCCTCTCCCTCA               |                  |     |
| oorD-RT-F      | TGTTAGCTATTGCCCGCTG                | This study       |     |
| oorD-RT-R      | GCCTCAGCAGTAAGTTTGGC               |                  |     |
| oorA-RT-F      | TCCATGACTGCAAGTAGCGG               |                  |     |
| oorA-RT-R      | ATCCCATGAGTTGGTGCTT                |                  |     |
| oorB-RT-F      | ATGCCTACTCAATGGTGTTGG              |                  |     |
| oorB-RT-R      | GCCTGTTGCATAAGCTATTGCT             |                  |     |
| oorC-RT-F      | GCAGCCATTAAAGAAGGTCGT              |                  |     |
| oorC-RT-R      | CCTTCTTTTACACCCCCACG               |                  |     |

97

98 **References**

- 99 1. Kim J, Hur JI, Ryu S, Jeon B. 2021. Bacteriophage-mediated modulation of bacterial  
100 competition during selective enrichment of *Campylobacter*. *Microbiol Spectr* 9:e01703-  
101 21. <https://doi.org/10.1128/spectrum.01703-21>.
